# Supplementary figures and images for: Negative regulation of ABA signaling by WRKY33 is critical for Arabidopsis immunity towards Botrytis cinerea 2100
Source: eLife journal article supplement (doi:10.7554/elife.07295), 2015-06-15

(A)

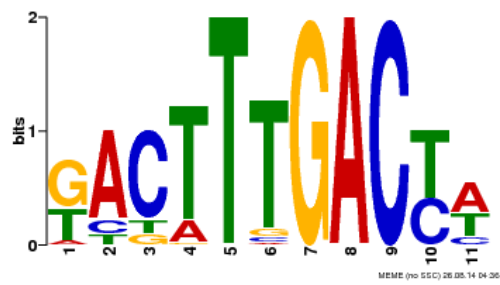

E=2.5e-002

(B)

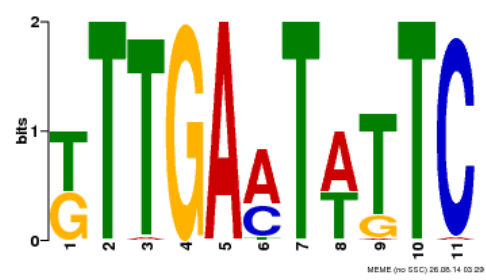

E=4.7e-030

(C)

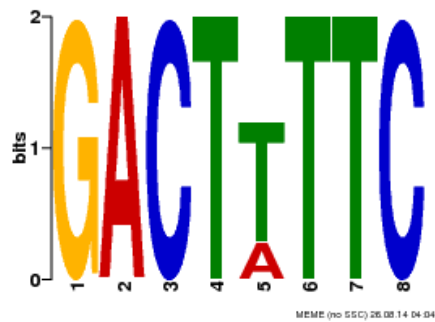

E=4.8e-009

(D)

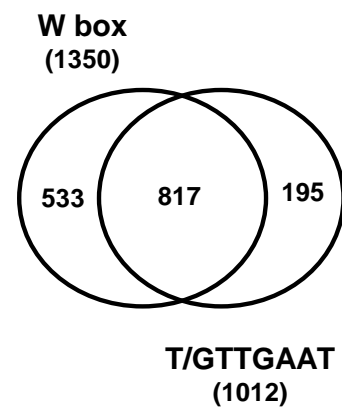

Figure 1- figure supplement 1

Supplement: supp [file elife_poa_e07295_Figure_1_figure_supplement_1.pdf › elife_poa_e07295_Figure_1_figure_supplement_1.pdf]

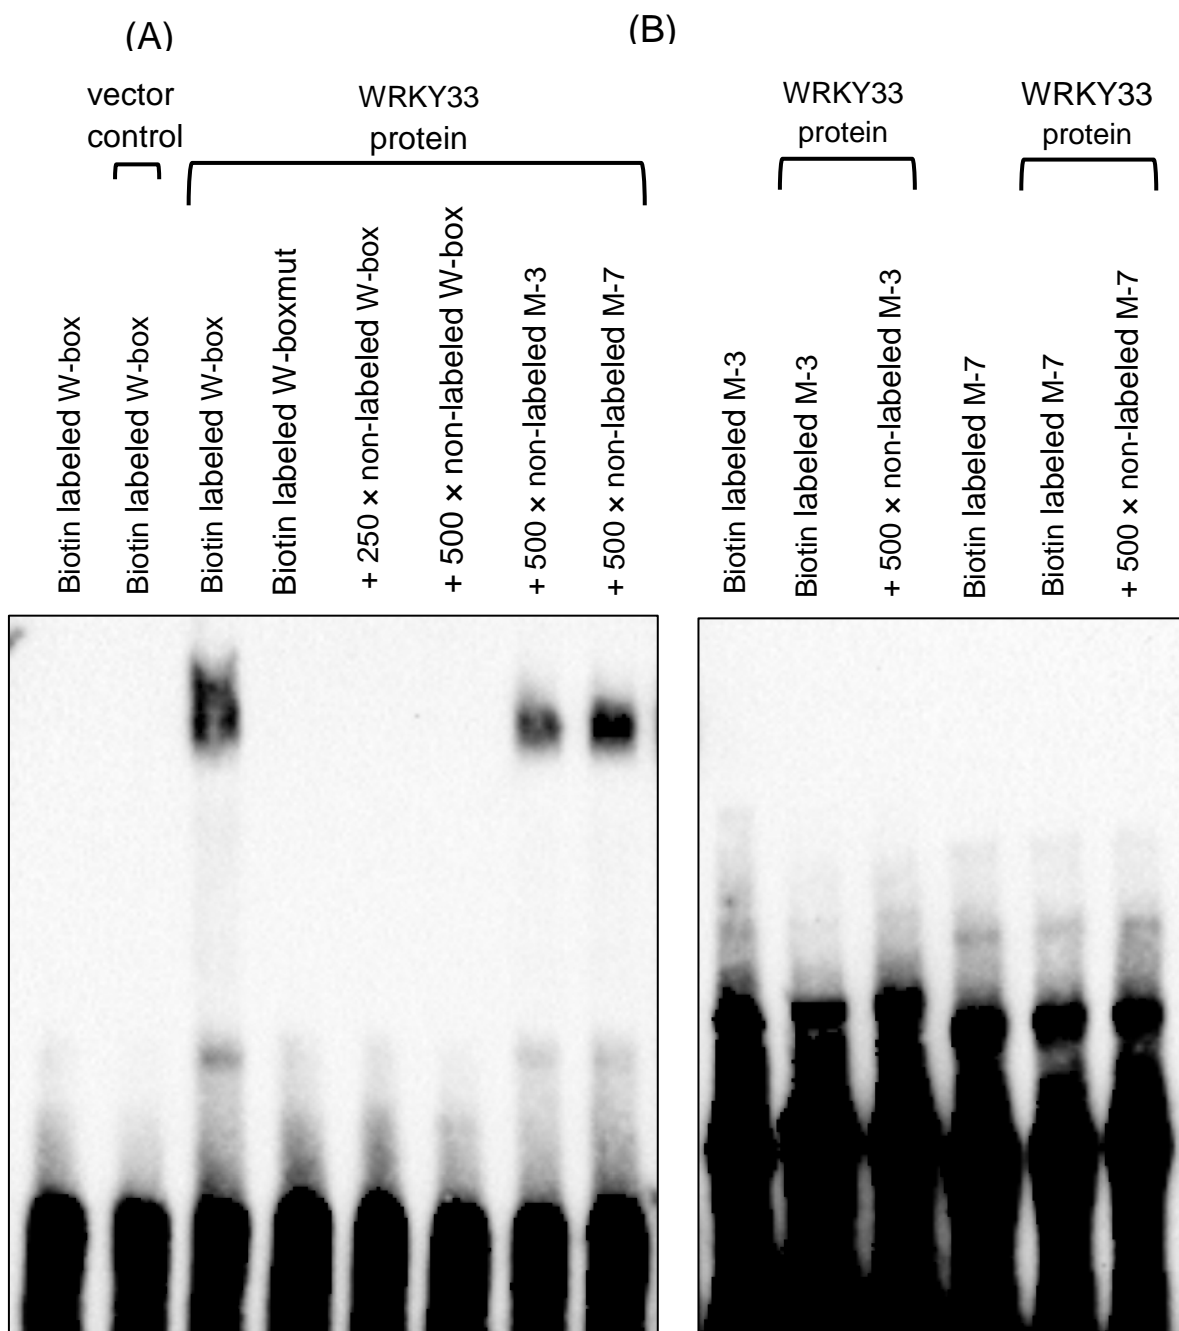

Figure 1- figure supplement 2

Supplement: supp [file elife_poa_e07295_Figure_1_figure_supplement_2.pdf › elife_poa_e07295_Figure_1_figure_supplement_2.pdf]

(A)

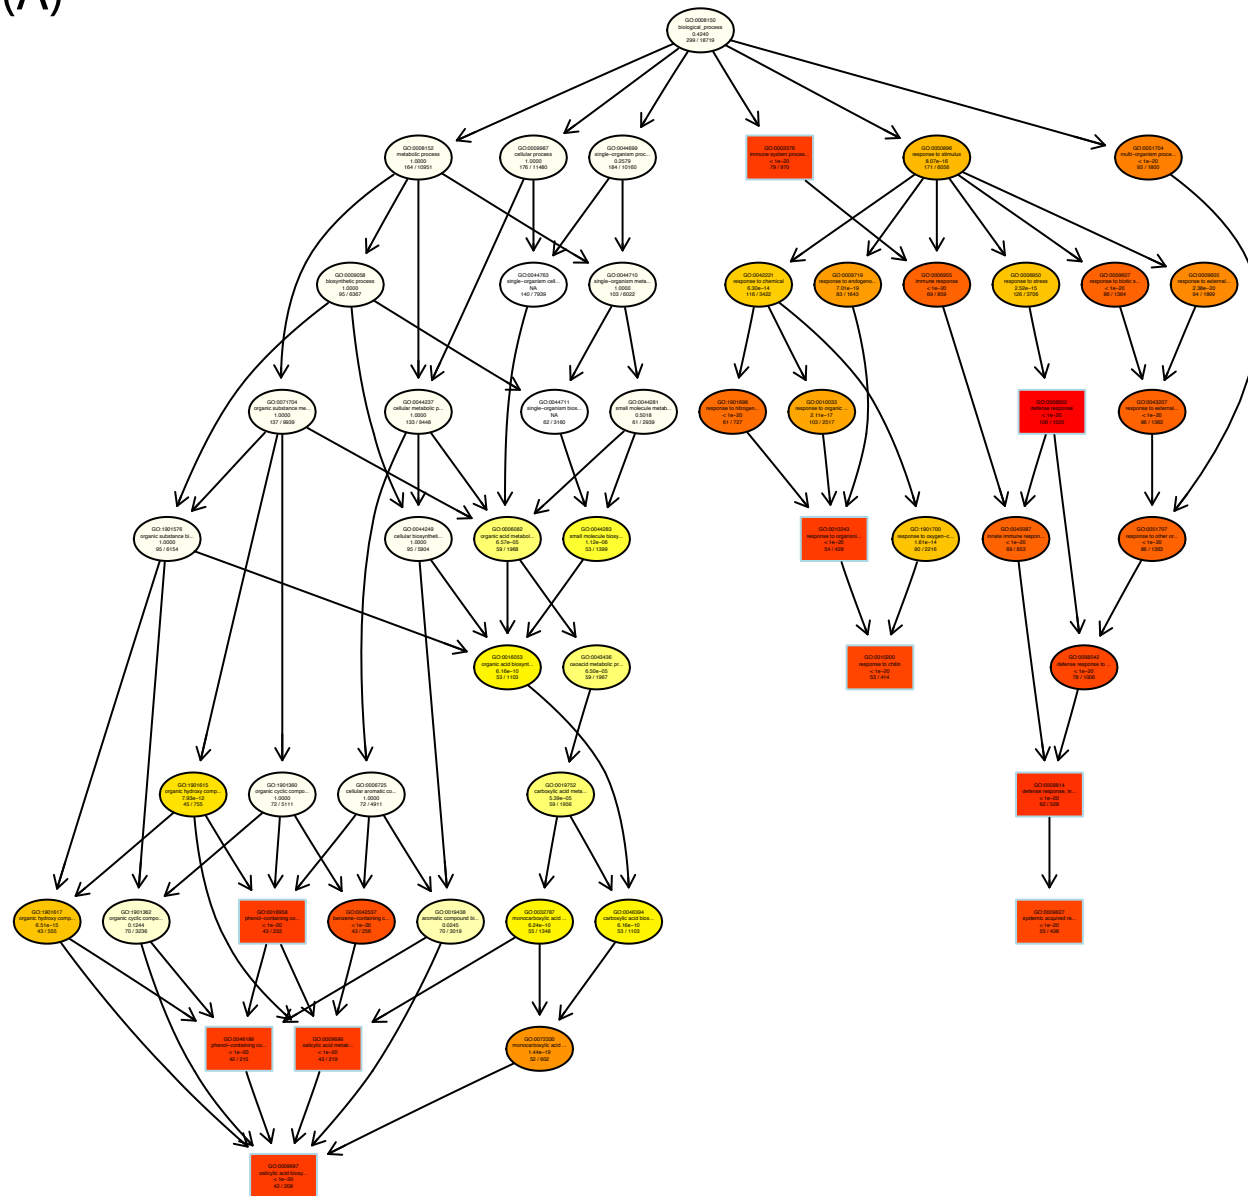

(B)

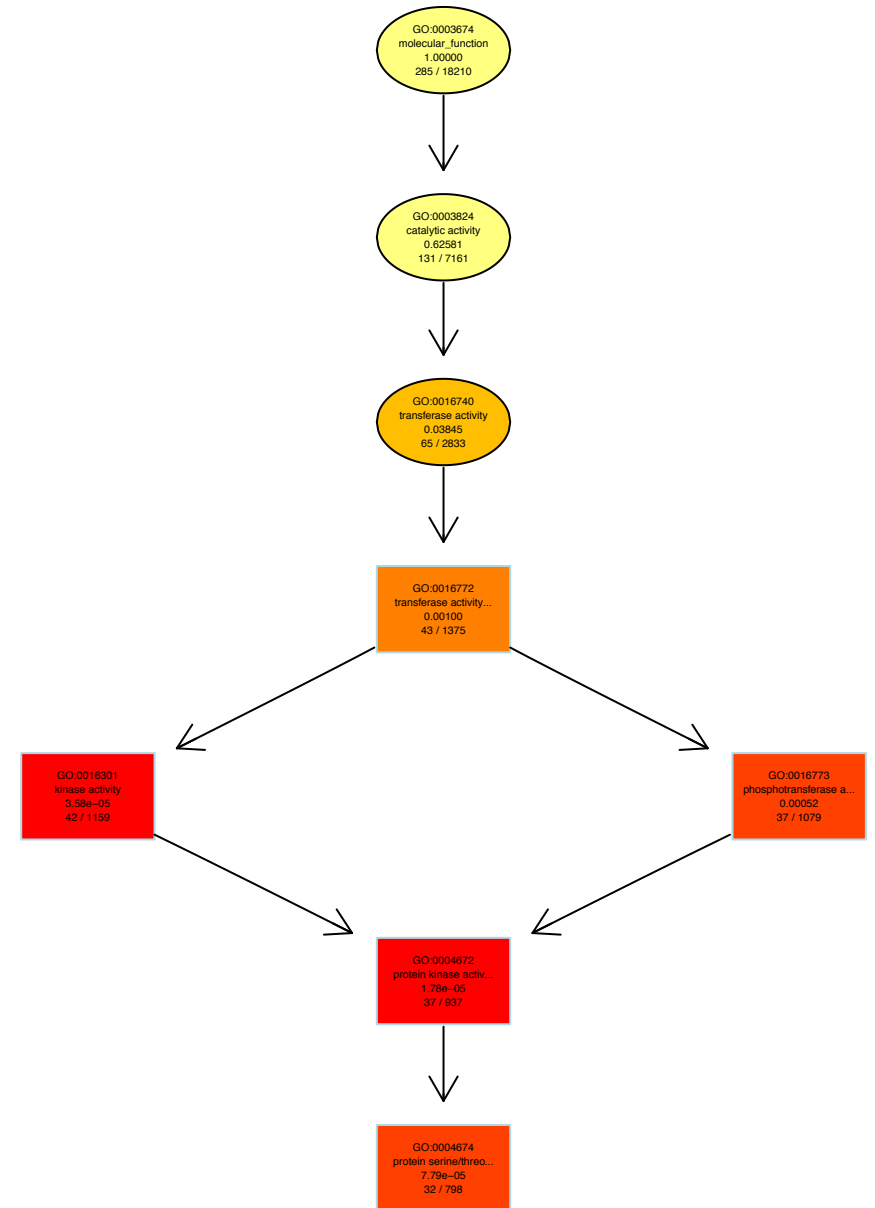

Figure 2 - figure supplement 1

Supplement: supp [file elife_poa_e07295_Figure_2_figure_supplement_1.pdf › elife_poa_e07295_Figure_2_figure_supplement_1.pdf]

(A)

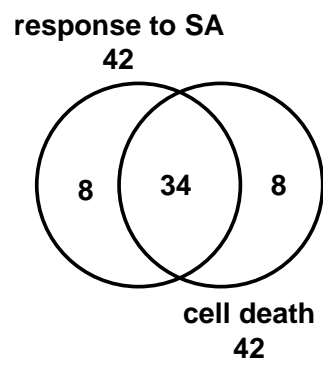

(B)

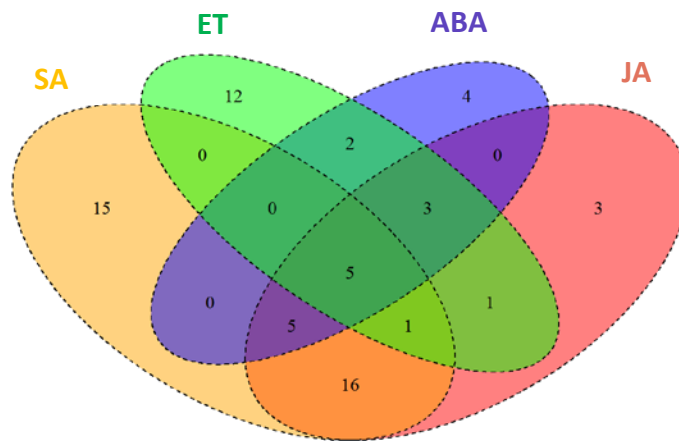

Figure 2 - figure supplement 2

Supplement: supp [file elife_poa_e07295_Figure_2_figure_supplement_2.pdf › elife_poa_e07295_Figure_2_figure_supplement_2.pdf]

(A)

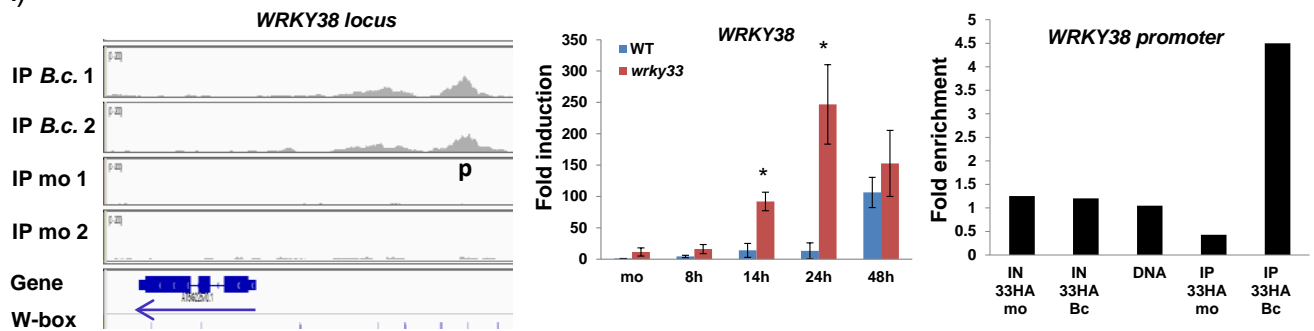

(B)

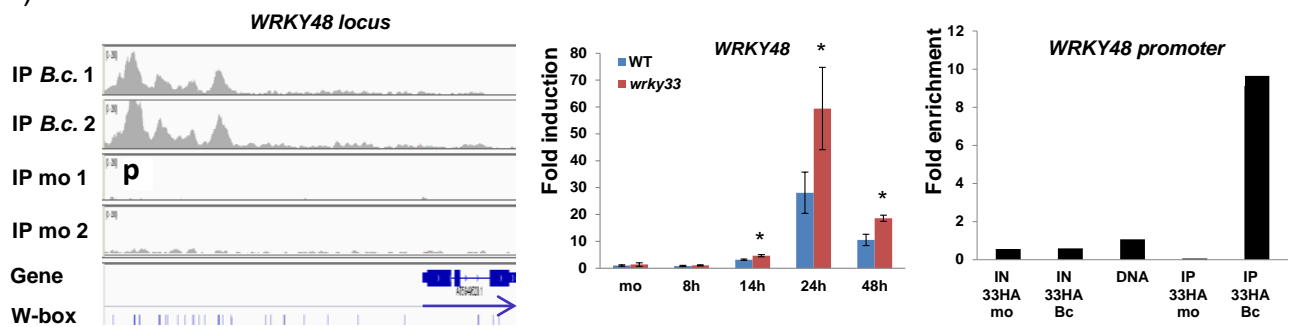

(C)

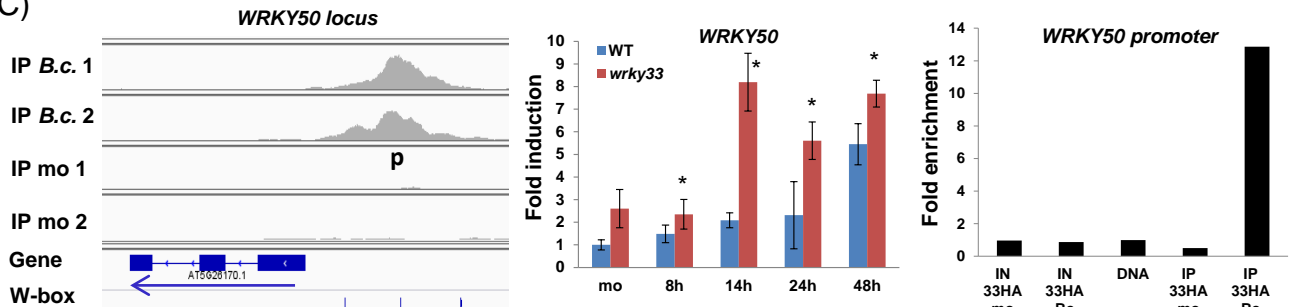

(D)

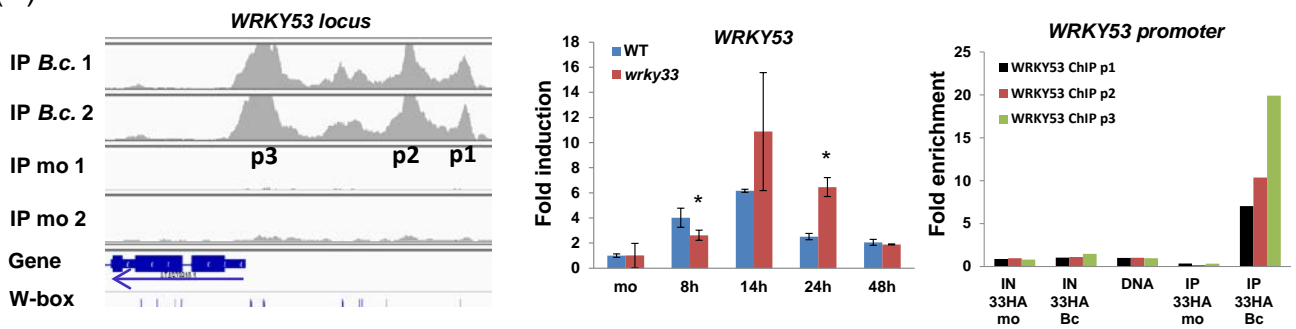

IGV map

qRT-PCR

ChIP-PCR

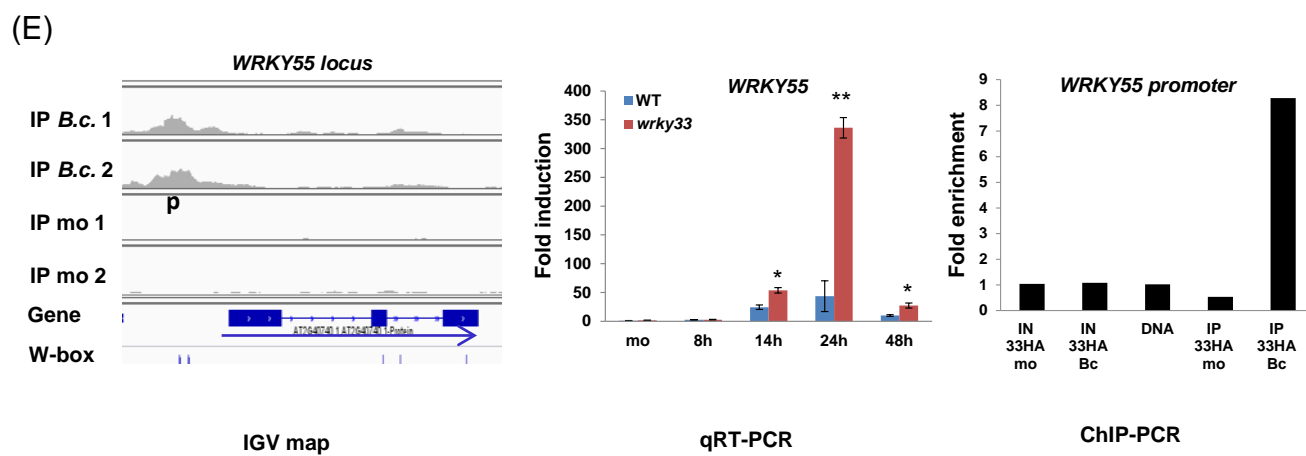

Figure 3 - figure supplement 1

Supplement: supp [file elife_poa_e07295_Figure_3_figure_supplement_1.pdf › elife_poa_e07295_Figure_3_figure_supplement_1.pdf]

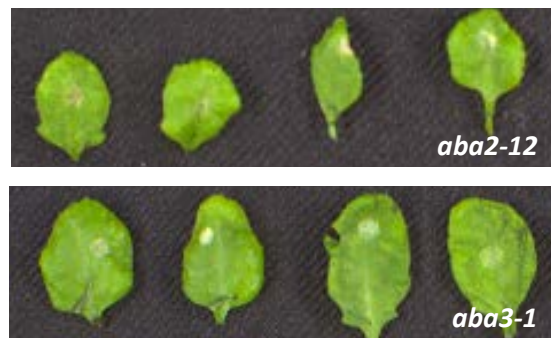

**Figure 5 - figure supplement 1**

Supplement: supp [file elife_poa_e07295_Figure_5_figure_supplement_1.pdf › elife_poa_e07295_Figure_5_figure_supplement_1.pdf]

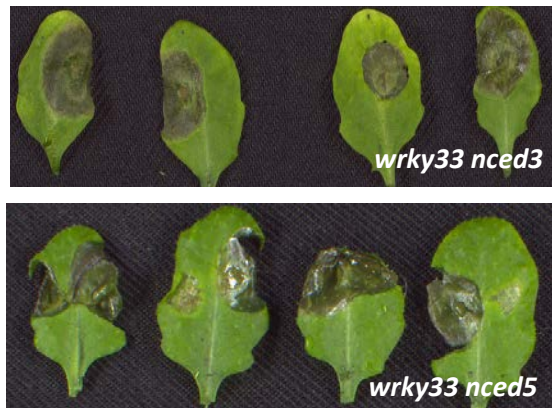

**Figure 5 - figure supplement 2**

Supplement: supp [file elife_poa_e07295_Figure_5_figure_supplement_2.pdf › elife_poa_e07295_Figure_5_figure_supplement_2.pdf]

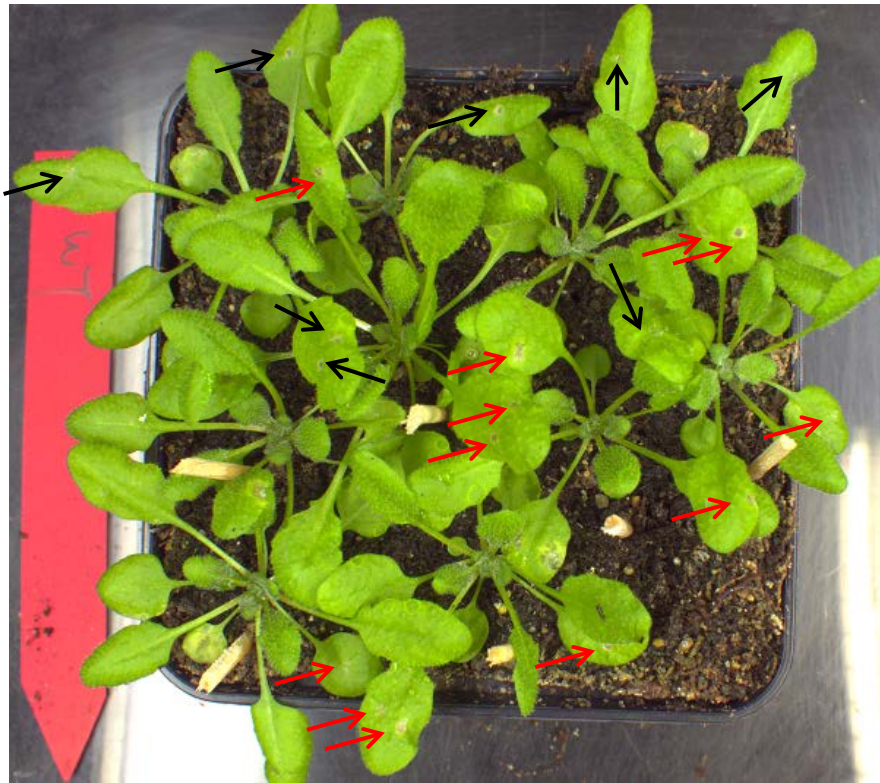

Figure 5 - figure supplement 3

Supplement: supp [file elife_poa_e07295_Figure_5_figure_supplement_3.pdf › elife_poa_e07295_Figure_5_figure_supplement_3.pdf]

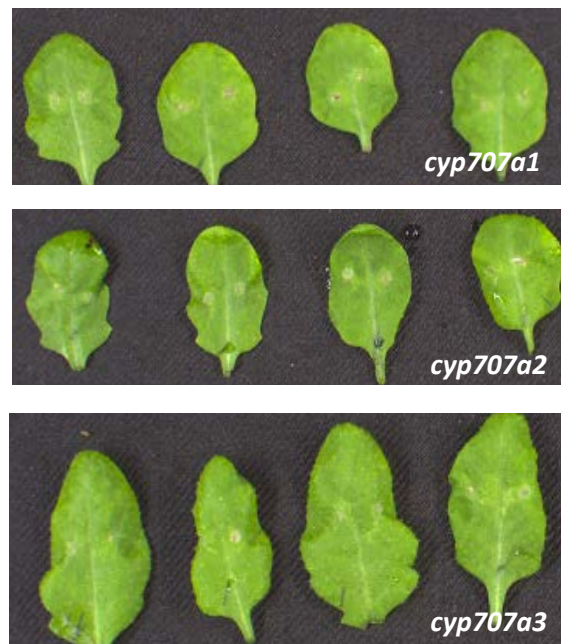

**Figure 5 - figure supplement 4**

Supplement: supp [file elife_poa_e07295_Figure_5_figure_supplement_4.pdf › elife_poa_e07295_Figure_5_figure_supplement_4.pdf]

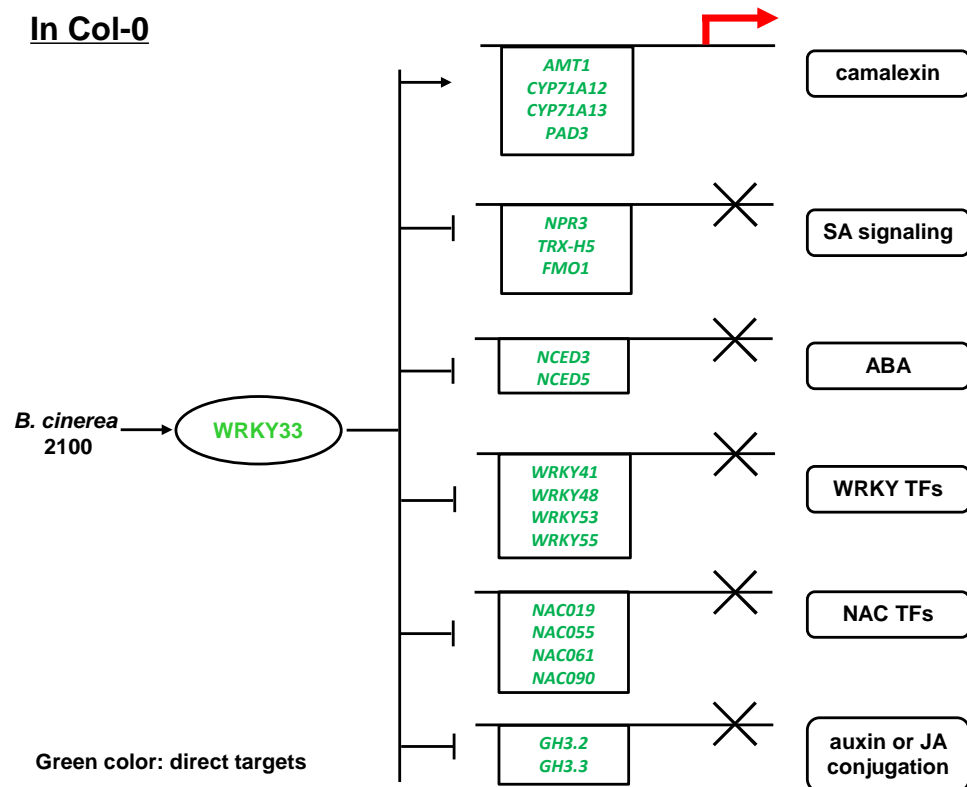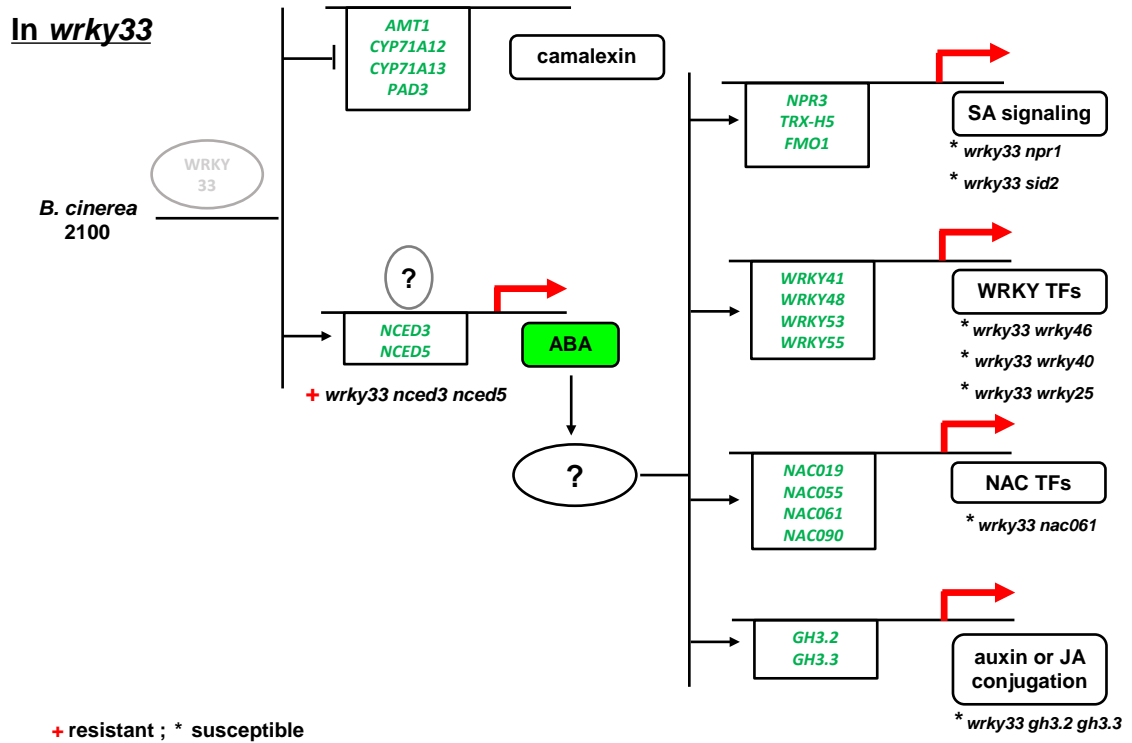

Figure 8 - figure supplement 1

Supplement: supp [file elife_poa_e07295_Figure_8_figure_supplement_1.pdf › elife_poa_e07295_Figure_8_figure_supplement_1.pdf]

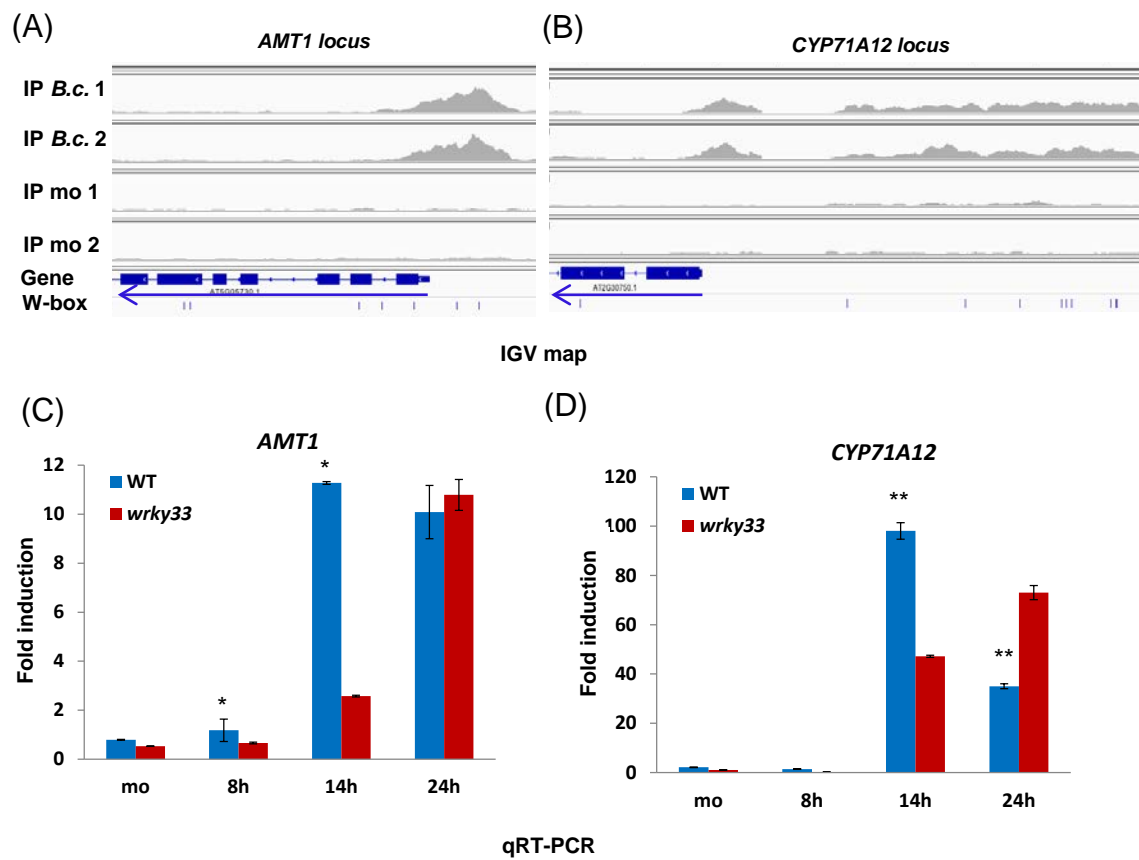

Figure 8 - figure supplement 2

Supplement: supp [file elife_poa_e07295_Figure_8_figure_supplement_2.pdf › elife_poa_e07295_Figure_8_figure_supplement_2.pdf]

(A)

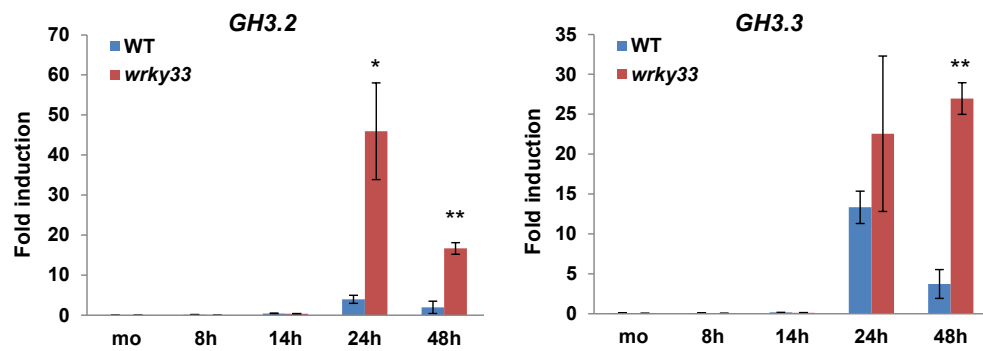

(B)

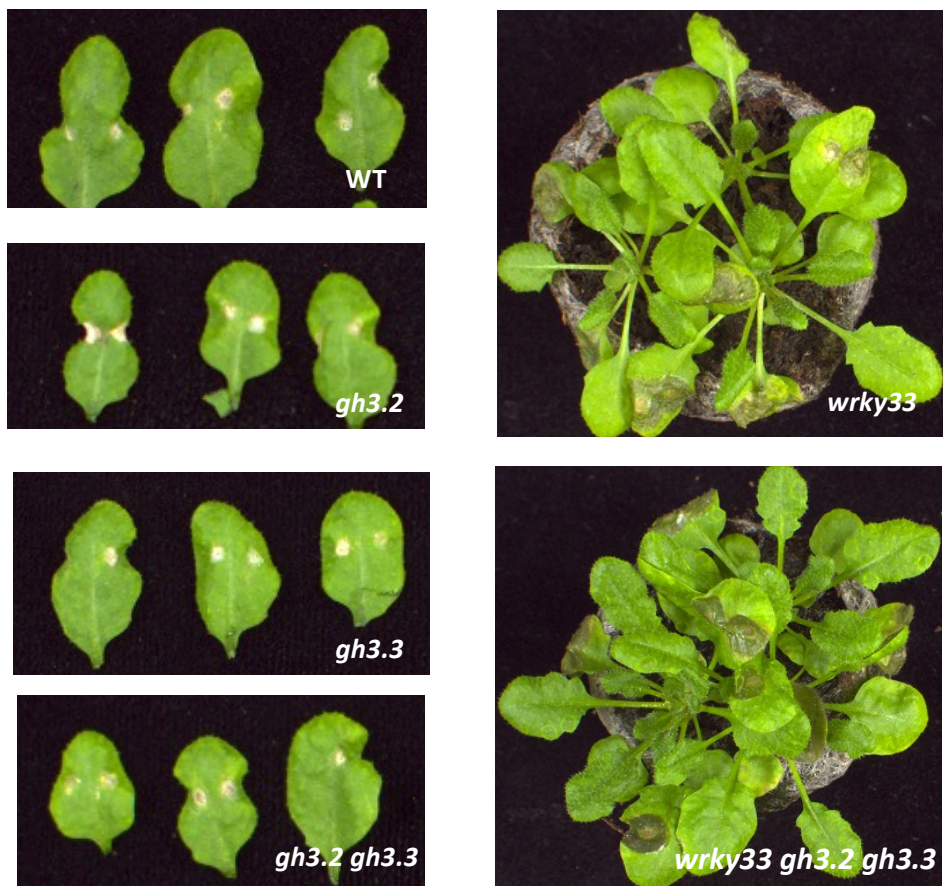

Figure 8 - figure supplement 3

Supplement: supp [file elife_poa_e07295_Figure_8_figure_supplement_3.pdf › elife_poa_e07295_Figure_8_figure_supplement_3.pdf]
